# Supplementary material
Source: ML conference proceedings conference paper supplement (https://openaccess.thecvf.com/content/CVPR2023/html/Li_Photo_Pre-Training_but_CVPR_2023_paper.html)
Supplement: Supplementary file 1 [file Li_Photo_Pre-Training_but_CVPR_2023_supplemental.pdf]

# Supplementary material: Photo Pre-Training, But for Sketch

Ke Li<sup>1,2</sup> Kaiyue Pang<sup>2</sup> Yi-Zhe Song<sup>2</sup>

<sup>1</sup> School of Artificial Intelligence, Beijing University of Posts and Telecommunications, China

<sup>2</sup> SketchX, CVSSP, University of Surrey, United Kingdom

## Experiment Settings

We validate our method on all five publicly available product-level FG-SBIR datasets, namely QMUL-Shoe-V1, QMUL-Shoe-V2, QMUL-Chair-V1, QMUL-Chair-V2 and QMUL-Handbag and follow their original train/test split for fairness [1]. Existing FG-SBIR works have employed various choices as their network backbones, with some common choices such as Sketch-a-Net [15, 16, 18], VGG-16 [12], DenseNet-169 [7], Inceptionv1 [11], InceptionV3 [2–4, 13, 14, 19]. Most of these backbones have been pre-trained on the ImageNet benchmark [17] with 1000-way classification (*i.e.* loaded from an off-the-shelf model zoo like `torchvision.models`), with few choosing a more tailored pre-training approach including learning on a third-party task and dataset [11, 18]. We choose ResNet50 [5] as our network backbone due to its increasing popularity and superiority as a better ConvNet architecture [8], while being still on a roughly similar scale (if not smaller) with those of baseline models.

We follow the Siamese choice [10] where sketch and photo representation learning share same set of parameters. All input data are first resized to 299 x 299 and randomly cropped to 256 x 256. Another data augmentation strategy used is horizontal flipping. We set the batch size to 16 and train 600 epochs for all task settings with a SGD optimiser and momentum value of 0.9<sup>1</sup>. We report top 1 ranking performance ( $acc@1$ ). To obtain the neighbourhood matrix  $R$ , we extract the feature from the last conv layer for each photos in the training set and form all possible photo triplets before ranking their relative distance. We pre-compute  $R$  once before conducting any online FG-SBIR learning. For both multi-task and meta learning setting: the learning rate is set to  $1e-3$  ( $\eta_s, \eta_t$ ) with  $\Delta_{sp} = 0.1$  and  $\Delta_{NT} = 0.01$ . Ratio  $\beta/\alpha = 1$  if not otherwise mentioned. A pytorch style algorithmic schematics can be found as follows.

<sup>1</sup>While Adam optimiser [6] is commonly adopted by existing FG-SBIR works and occasionally leads to a better peak performance, we find such superiority in reported numbers with trade off from worse reproducibility troubling. We therefore choose SGD-M which yields a more stable test-time performance. We also experience with other more advanced optimisers like Adam-W [9] but do not observe extra gains.

---

## ALGORITHM 1

Pseudo code for implementing Eq. 9 of the main text, which usually takes a few more lines in practice (**line 6,8,10**).

- 1: **Input:**  $\{s, p^+, p^-\} \in \mathbb{R}_{B \times H \times W \times C}$  – triplet batch inputs.  $R \in \mathbb{R}_{B \times B \times B}$  – relative neighbourhood ranking matrix.  $K$  – number of local neighbourhood relations simulated per update.  $\theta_n, \{\eta_s, \eta_t, \Delta_{FG-SBIR}, \Delta_{NT}, \epsilon\}$  – current model state and some hyperparameters.
- 2: **Output:**  $\theta_{n+1}$  – updated model state directed by both  $L_{FG-SBIR}$  and  $L_{NT}$

---

- 3: *% calculate gradient of  $\theta_n$  w.r.t.  $L_{FG-SBIR}$*
- 4:  $\hat{g} := \theta_n.\text{grad}(\max(\text{MSELoss}(\Psi(s, \theta_n), \Psi(p^+, \theta_n)) - \text{MSELoss}(\Psi(s, \theta_n), \Psi(p^-, \theta_n)) + \Delta_{sp}, 0))$
- 5: *% calculate intermediate model state  $\theta_{temp}$ .*
- 6:  $\theta_{temp} := \theta_n - \eta_s \hat{g}$
- 7: *% form  $K$  random batch-wise triplets for each  $s$ .*
- 8:  $\{p_*^+, p_*^-\} := \text{random.sample}(\text{unique}(\text{meshgrid}(\text{range}[1, B], \text{range}[1, B])), K)$
- 9: *% calculate gradient of  $\theta_{temp}$  w.r.t.  $L_{NT}$*
- 10:  $\bar{g} := \theta_{temp}.\text{grad}(\max(\mathbf{R}(:, [s, p_*^+, p_*^-]) \times (\text{MSELoss}(\Psi(s, \theta_{temp}), \Psi(p_*^+, \theta_{temp})) - \text{MSELoss}(\Psi(s, \theta_{temp}), \Psi(p_*^-, \theta_{temp}))) + \Delta_{NT}, 0))$
- 11: *% writing down the final update rule*
- 12:  $\theta_{n+1} := \theta_n - \eta_s \hat{g} - \eta_t \bar{g}$

---

## References

- [1] SketchX!-Shoe/Chair Fine-grained-SBIR dataset. <http://sketchx.ai>, 2022. 1
- [2] Ayan Kumar Bhunia, Pinaki Nath Chowdhury, Aneeshan Sain, Yongxin Yang, Tao Xiang, and Yi-Zhe Song. More photos are all you need: Semi-supervised learning for fine-grained sketch based image retrieval. In *CVPR*, 2021. 1
- [3] Ayan Kumar Bhunia, Subhadeep Koley, Abdullah Faiz Ur Rahman Khilji, Aneeshan Sain, Pinaki Nath Chowdhury, Tao Xiang, and Yi-Zhe Song. Sketching without worrying: Noise-tolerant sketch-based image retrieval. In *CVPR*, 2022. 1
- [4] Ayan Kumar Bhunia, Yongxin Yang, Timothy M Hospedales, Tao Xiang, and Yi-Zhe Song. Sketch less

- for more: On-the-fly fine-grained sketch-based image retrieval. In *CVPR*, 2020. 1
- [5] Kaiming He, Xiangyu Zhang, Shaoqing Ren, and Jian Sun. Deep residual learning for image recognition. In *CVPR*, 2016. 1
  - [6] Diederik P Kingma and Jimmy Ba. Adam: A method for stochastic optimization. *arXiv preprint arXiv:1412.6980*, 2014. 1
  - [7] Hangyu Lin, Yanwei Fu, Peng Lu, Shaogang Gong, Xiangyang Xue, and Yu-Gang Jiang. Tc-net for isbir: Triplet classification network for instance-level sketch based image retrieval. In *ACM MM*, 2019. 1
  - [8] Zhuang Liu, Hanzi Mao, Chao-Yuan Wu, Christoph Feichtenhofer, Trevor Darrell, and Saining Xie. A convnet for the 2020s. In *CVPR*, 2022. 1
  - [9] Ilya Loshchilov and Frank Hutter. Decoupled weight decay regularization. *arXiv preprint arXiv:1711.05101*, 2017. 1
  - [10] Kaiyue Pang, Yi-Zhe Song, Tony Xiang, and Timothy M Hospedales. Cross-domain generative learning for fine-grained sketch-based image retrieval. In *BMVC*, 2017. 1
  - [11] Kaiyue Pang, Yongxin Yang, Timothy M Hospedales, Tao Xiang, and Yi-Zhe Song. Solving mixed-modal jigsaw puzzle for fine-grained sketch-based image retrieval. In *CVPR*, 2020. 1
  - [12] Filip Radenovic, Giorgos Tolias, and Ondrej Chum. Deep shape matching. In *ECCV*, 2018. 1
  - [13] Aneeshan Sain, Ayan Kumar Bhunia, Yongxin Yang, Tao Xiang, and Yi-Zhe Song. Cross-modal hierarchical modelling for fine-grained sketch based image retrieval. In *BMVC*, 2020. 1
  - [14] Aneeshan Sain, Ayan Kumar Bhunia, Yongxin Yang, Tao Xiang, and Yi-Zhe Song. Stylemeup: Towards style-agnostic sketch-based image retrieval. In *CVPR*, 2021. 1
  - [15] Jifei Song, Yi-Zhe Song, Tao Xiang, Timothy M Hospedales, and Xiang Ruan. Deep multi-task attribute-driven ranking for fine-grained sketch-based image retrieval. In *BMVC*, 2016. 1
  - [16] Jifei Song, Qian Yu, Yi-Zhe Song, Tao Xiang, and Timothy M Hospedales. Deep spatial-semantic attention for fine-grained sketch-based image retrieval. In *ICCV*, 2017. 1
  - [17] Christian Szegedy, Wei Liu, Yangqing Jia, Pierre Sermanet, Scott Reed, Dragomir Anguelov, Dumitru Erhan, Vincent Vanhoucke, and Andrew Rabinovich. Going deeper with convolutions. In *CVPR*, 2015. 1
  - [18] Qian Yu, Feng Liu, Yi-Zhe Song, Tao Xiang, Timothy M Hospedales, and Chen-Change Loy. Sketch me that shoe. In *CVPR*, 2016. 1
  - [19] Qian Yu, Jifei Song, Yi-Zhe Song, Tao Xiang, and Timothy M Hospedales. Fine-grained instance-level sketch-based image retrieval. *International Journal of Computer Vision*, 2021. 1
